# Supplementary material for: Identification of novel small molecule Beclin 1 mimetics activating autophagy
Source: PubMed Central journal article supplement (PMC5584254; doi:10.18632/oncotarget.17977), 2017-05-18
Supplement: oncotarget-08-51355-s001.pdf [file oncotarget-08-51355-s001.pdf]

# Identification of novel small molecule Beclin 1 mimetics activating autophagy

## Supplementary Materials

### CHEMISTRY

All chemical reagents were purchased from commercial sources and used without further purification. Thin-layer chromatography (TLC) was conducted on silica gel GF-254 glass plates.  $^1\text{H}$  NMR and  $^{13}\text{C}$  NMR spectra were recorded on a Bruker Avance 400 (400 MHz) NMR spectrometer. ESI-MS was recorded on Agilent 1100 LC/MSD (70 eV) spectrometer. High resolution mass spectra (HRMS) were recorded on a Waters Q-ToF micro mass spectrometer.

#### General procedure I. $N^1$ -(6-Chloro-2-methoxyacridin-9-yl)- $N^4, N^4$ -diethylbutane-1,4-diamine (7)

6,9-Dichloro-2-methoxyacridine (200 mg, 0.72 mmol) and phenol (1.7 g, 18 mmol) were stirred at 100 °C for 1h before addition of 4-(diethylamino)butylamine (0.125 mL, 0.76 mmol). The reaction mixture was allowed to react at 100 °C for 3 h and then cooled at room temperature. The mixture was basified with 2N NaOH (40 mL) and extracted with ethyl acetate (3 × 50 mL). The organic layer was washed with brine, dried over  $\text{Na}_2\text{SO}_4$ , filtered and concentrated under reduced pressure. The residue was purified by reverse phase chromatography ( $\text{CH}_3\text{CN}$ :  $\text{H}_2\text{O}$ :  $\text{NH}_4\text{OH}$ ) to give the pure product **7** as yellow oil, yield 103 mg, 37%.  $^1\text{H}$  NMR (400 MHz, Chloroform-*d*)  $\delta$  7.99 (d,  $J = 2.1$  Hz, 1H), 7.94 (d,  $J = 9.3$  Hz, 1H), 7.93 (d,  $J = 9.4$  Hz, 1H), 7.35 (dd,  $J = 9.4$ , 2.7 Hz, 1H), 7.20 (d,  $J = 2.1$  Hz, 1H), 7.18 (d,  $J = 2.2$  Hz, 1H), 7.17 (d,  $J = 2.7$  Hz, 1H), 5.18 (s, 1H), 3.88 (s, 3H), 3.64 (t,  $J = 6.8$  Hz, 2H), 2.47 (q,  $J = 7.2$  Hz, 4H), 2.41 (t,  $J = 7.2$  Hz, 2H), 1.72 (p,  $J = 6.9$  Hz, 2H), 1.55 (p,  $J = 7.3$  Hz, 2H), 0.95 (t,  $J = 7.2$  Hz, 6H);  $^{13}\text{C}$  NMR (101 MHz, Chloroform-*d*)  $\delta$  155.73, 149.99, 148.38, 146.81, 134.67, 131.36, 128.12, 124.31, 124.30, 124.14, 117.72, 115.68, 99.72, 55.54, 52.18, 50.62, 46.79, 29.70, 24.89, 11.43; IR  $\nu_{\text{max}}$  ( $\text{cm}^{-1}$ ) 3271, 2950, 2828, 1562, 1435, 1236, 823; HRMS calcd for  $\text{C}_{22}\text{H}_{29}\text{ClN}_3\text{O}$  [ $\text{M}+\text{H}$ ] $^+$  386.19, found 386.20.

#### 2-(2-((6-Chloro-2-methoxyacridin-9-yl)amino)ethoxy)ethanol (8)

**8** was prepared from 6,9-dichloro-2-methoxyacridine and 2-(2-aminoethoxy)ethanol according to general procedure I. Yield 249 mg, 99%, m.p. 142-145.  $^1\text{H}$  NMR (400 MHz, Chloroform-*d*)  $\delta$  8.08 (d,  $J = 2.1$  Hz, 1H), 8.04

(d,  $J = 9.1$  Hz, 1H), 8.01 (d,  $J = 9.4$  Hz, 1H), 7.42 (dd,  $J = 9.4$ , 2.7 Hz, 1H), 7.31 (dd,  $J = 9.2$ , 2.1 Hz, 1H), 7.25 (s, 1H), 3.96 (s, 3H), 3.84 (ddd,  $J = 9.2$ , 5.4, 4.2 Hz, 4H), 3.68–3.59 (m, 4H);  $^{13}\text{C}$  NMR (126 MHz, Chloroform-*d*)  $\delta$  156.27, 149.67, 148.21, 146.80, 134.90, 131.42, 128.19, 124.91, 124.86, 124.28, 118.98, 116.93, 99.19, 72.58, 70.23, 61.85, 55.63, 49.99; IR  $\nu_{\text{max}}$  ( $\text{cm}^{-1}$ ) 3323, 3097, 2900, 2837, 1562, 1431, 1228, 1135, 827, 768; HRMS calcd for  $\text{C}_{18}\text{H}_{20}\text{ClN}_2\text{O}_3$  [ $\text{M}+\text{H}$ ] $^+$  347.11, found 347.11.

#### 6-Chloro-2-methoxy-9-(4-methylpiperazin-1-yl)acridine (9)

**9** was prepared from 6,9-dichloro-2-methoxyacridine and 1-methylpiperazine according to general procedure I. Yield 115 mg, 47%, m.p. 135-138.  $^1\text{H}$  NMR (400 MHz, Chloroform-*d*)  $\delta$  8.31 (d,  $J = 9.3$  Hz, 1H), 8.16 (d,  $J = 1.9$  Hz, 1H), 8.07 (d,  $J = 9.4$  Hz, 1H), 7.52 (d,  $J = 2.8$  Hz, 1H), 7.45 (dd,  $J = 9.4$ , 2.8 Hz, 1H), 7.40 (dd,  $J = 9.3$ , 2.1 Hz, 1H), 3.98 (s, 3H), 3.66–3.59 (m, 4H), 2.79–2.72 (m, 4H), 2.50 (s, 3H);  $^{13}\text{C}$  NMR (126 MHz, Chloroform-*d*)  $\delta$  156.97, 152.28, 148.89, 148.20, 134.73, 131.87, 128.72, 126.33, 125.87, 125.68, 125.44, 123.46, 100.38, 56.56, 55.73, 52.08, 46.83; IR  $\nu_{\text{max}}$  ( $\text{cm}^{-1}$ ) 2937, 2831, 2787, 1420, 1225, 802, 770; HRMS calcd for  $\text{C}_{19}\text{H}_{21}\text{ClN}_3\text{O}$  [ $\text{M}+\text{H}$ ] $^+$  342.13, found 342.13.

#### 6-Chloro-2-methoxy-9-phenoxyacridine(10)

**10** was the by-product separated from the above preparation of compound **9**. Yield 36 mg, 15%.  $^1\text{H}$  NMR (400 MHz, Chloroform-*d*)  $\delta$  8.23 (dd,  $J = 2.0$ , 0.5 Hz, 1H), 8.16–8.08 (m, 1H), 7.98 (dd,  $J = 9.2$ , 0.5 Hz, 1H), 7.48 (dd,  $J = 9.5$ , 2.8 Hz, 1H), 7.37 (dd,  $J = 9.2$ , 2.0 Hz, 1H), 7.32–7.26 (m, 2H), 7.16 (d,  $J = 2.8$  Hz, 1H), 7.10–7.02 (m, 1H), 6.86 (t,  $J = 1.6$  Hz, 1H), 6.85 (dd,  $J = 2.0$ , 0.9 Hz, 1H), 3.81 (s, 3H);  $^{13}\text{C}$  NMR (126 MHz, Chloroform-*d*)  $\delta$  159.13, 157.63, 153.60, 148.79, 148.64, 135.56, 131.40, 130.17, 128.29, 127.41, 126.63, 123.87, 122.93, 121.33, 119.00, 115.72, 97.85, 55.72; IR  $\nu_{\text{max}}$  ( $\text{cm}^{-1}$ ) 3044, 2919, 2850, 1630, 1471, 1206, 755; HRMS calcd for  $\text{C}_{20}\text{H}_{15}\text{ClNO}_2$  [ $\text{M}+\text{H}$ ] $^+$  336.07, found 336.09.

#### 2-Methoxy-9-(4-nitrophenyl)acridine (11)

**11** was prepared from 6,9-dichloro-2-methoxyacridine and 4-nitrophenylboronic acid pinacol ester according to general procedure II. But the reaction temperature is 150°C, and the reaction time is 30 minutes. m.p. 244-246.  $^1\text{H}$  NMR (400 MHz, Chloroform-*d*)  $\delta$

8.54–8.46 (m, 2H), 8.27 (dt,  $J = 8.8, 1.0$  Hz, 1H), 8.20 (d,  $J = 9.5$  Hz, 1H), 7.74 (ddd,  $J = 8.7, 6.0, 1.9$  Hz, 1H), 7.69–7.63 (m, 2H), 7.52–7.42 (m, 3H), 6.64 (d,  $J = 2.7$  Hz, 1H), 3.75 (s, 3H);  $^{13}\text{C}$  NMR (126 MHz, Chloroform-*d*)  $\delta$  157.69, 148.10, 147.12, 146.07, 143.80, 141.49, 131.73, 131.67, 130.07, 129.19, 126.71, 125.49, 125.41, 125.36, 124.84, 124.13, 101.00, 55.57; IR  $\nu_{\text{max}}$  ( $\text{cm}^{-1}$ ) 3031, 2924, 2852, 1513, 1346, 1226, 821, 748; HRMS calcd for  $\text{C}_{20}\text{H}_{15}\text{N}_2\text{O}_3$   $[\text{M}+\text{H}]^+$  331.1011, found 331.1086.

## 2-Methoxy-9-(pyridin-4-yl)acridine (12)

12 was prepared from 6,9-Dichloro-2-methoxyacridine and 4-pyridinylboronic acid according to general procedure II. But the reaction temperature is 150°C, and the reaction time is 10 minutes. m.p. 170–174.  $^1\text{H}$  NMR (400 MHz, Chloroform-*d*)  $\delta$  8.94–8.87 (m, 2H), 8.26 (d,  $J = 8.8$  Hz, 1H), 8.19 (d,  $J = 9.5$  Hz, 1H), 7.78–7.69 (m, 1H), 7.57–7.39 (m, 5H), 6.69 (d,  $J = 2.7$  Hz, 1H), 3.75 (s, 3H);  $^{13}\text{C}$  NMR (126 MHz, Chloroform-*d*)  $\delta$  157.60, 150.48, 147.13, 146.07, 145.16, 141.01, 131.66, 130.01, 129.16, 126.60, 125.49, 125.47, 125.14, 124.55, 101.07, 55.56; IR  $\nu_{\text{max}}$  ( $\text{cm}^{-1}$ ) 3041, 2922, 2852, 2048, 1229, 820, 755, 746; HRMS calcd for  $\text{C}_{19}\text{H}_{15}\text{N}_2\text{O}$   $[\text{M}+\text{H}]^+$  287.1118, found 287.1188.

## General procedure II.6-Chloro-2-methoxy-9-(pyridin-4-yl)acridine (13)

To a solution of 6,9-dichloro-2-methoxyacridine (100 mg, 0.36 mmol) in 4 mL of DMF/ $\text{H}_2\text{O}$  (4:1) was added 4-pyridinylboronic acid (44.2 mg, 0.36 mmol). The mixture was degassed with argon. Then bis(triphenylphosphine) palladium(II) dichloride ( $\text{PdCl}_2(\text{PPh}_3)_2$ ) (50 mg, 0.072 mmol) and potassium carbonate (100 mg, 0.72 mmol) was added. The mixture was microwaved at 100°C for 5 minutes. After cooled at room temperature, the mixture was partitioned in EtOAc (80 mL) and  $\text{H}_2\text{O}$  (50 mL). The organic layer was separated, washed with brine, dried over  $\text{Na}_2\text{SO}_4$  and concentrated under reduced pressure. The residue was purified by reverse phase chromatography at stand base condition ( $\text{CH}_3\text{CN}:\text{H}_2\text{O}:\text{NH}_4\text{OH}$ ) to give the pure product **13**, yield 38%, m.p. 232–235.  $^1\text{H}$  NMR (400 MHz, Chloroform-*d*)  $\delta$  8.94–8.88 (m, 2H), 8.26 (d,  $J = 1.6$  Hz, 1H), 8.16 (d,  $J = 9.5$  Hz, 1H), 7.50 (dd,  $J = 9.5, 2.8$  Hz, 1H), 7.47 (d,  $J = 9.2$  Hz, 1H), 7.44–7.37 (m, 2H), 7.38 (dd,  $J = 9.3, 2.1$  Hz, 1H), 6.67 (d,  $J = 2.7$  Hz, 1H), 3.75 (s, 3H);  $^{13}\text{C}$  NMR (126 MHz, Chloroform-*d*)  $\delta$  157.84, 150.59, 147.09, 146.65, 144.64, 141.28, 135.16, 131.60, 128.45, 127.84, 126.90, 126.08, 125.32, 125.19, 122.92, 101.12, 55.60; IR  $\nu_{\text{max}}$  ( $\text{cm}^{-1}$ ) 3036, 2922, 2852, 2044, 1628, 1421, 1233, 836, 776; HRMS calcd for  $\text{C}_{19}\text{H}_{14}\text{ClN}_2\text{O}$   $[\text{M}+\text{H}]^+$  321.0723, found 321.0798.

## 6-Chloro-2-methoxy-9-(4-nitrophenyl)acridine (14)

14 was prepared from 6,9-dichloro-2-methoxyacridine and 4-nitrophenylboronic acid pinacol

ester according to general procedure II. Yield 17%, m.p. 233–236.  $^1\text{H}$  NMR (400 MHz, Chloroform-*d*)  $\delta$  8.51 (d,  $J = 8.7$  Hz, 2H), 8.26 (d,  $J = 1.8$  Hz, 1H), 8.17 (d,  $J = 9.5$  Hz, 1H), 7.65 (d,  $J = 8.7$  Hz, 2H), 7.51 (dd,  $J = 9.5, 2.7$  Hz, 1H), 7.46–7.34 (m, 2H), 6.62 (d,  $J = 2.7$  Hz, 1H), 3.75 (s, 3H);  $^{13}\text{C}$  NMR (126 MHz, Chloroform-*d*)  $\delta$  157.94, 148.25, 147.10, 146.68, 143.23, 141.77, 135.20, 131.66, 131.58, 128.53, 127.95, 126.79, 126.09, 125.48, 124.25, 123.22, 101.06, 55.62; IR  $\nu_{\text{max}}$  ( $\text{cm}^{-1}$ ) 2923, 2852, 1508, 1342, 1230, 827, 736; HRMS calcd for  $\text{C}_{20}\text{H}_{14}\text{ClN}_2\text{O}_3$   $[\text{M}+\text{H}]^+$  365.0608, found 365.0683.

## 6-Chloro-9-(4-fluorophenyl)-2-methoxyacridine (15)

15 was prepared from 6,9-dichloro-2-methoxyacridine and 4-fluorophenylboronic acid pinacol ester according to general procedure II. Yield 33%, m.p. 185–187.  $^1\text{H}$  NMR (400 MHz, Chloroform-*d*)  $\delta$  8.24–8.21 (m, 1H), 8.13 (d,  $J = 9.4$  Hz, 1H), 7.54 (d,  $J = 9.2$  Hz, 1H), 7.48 (dd,  $J = 9.4, 2.8$  Hz, 1H), 7.40 (ddd,  $J = 8.0, 5.2, 2.4$  Hz, 2H), 7.37–7.29 (m, 3H), 6.76 (d,  $J = 2.7$  Hz, 1H), 3.75 (s, 3H);  $^{13}\text{C}$  NMR (126 MHz, Chloroform-*d*)  $\delta$  163.94, 161.96, 157.46, 147.26, 146.72, 143.82, 134.98, 132.15, 132.08, 131.88, 131.85, 131.41, 128.26, 127.61, 127.31, 126.25, 125.79, 124.00, 116.20, 116.03, 101.83, 55.52; IR  $\nu_{\text{max}}$  ( $\text{cm}^{-1}$ ) 3043, 2954, 2925, 2825, 1629, 1421, 1229, 801; HRMS calcd for  $\text{C}_{20}\text{H}_{14}\text{ClFNO}$   $[\text{M}+\text{H}]^+$  338.0673, found 338.0749.

## tert-Butyl (4-(6-chloro-2-methoxyacridin-9-yl)phenyl)carbamate (16)

16 was prepared from 6,9-dichloro-2-methoxyacridine and 4-(*N*-Boc-amino)phenylboronic acid pinacol ester according to general procedure II. Yield 43%, m.p. 175–179.  $^1\text{H}$  NMR (400 MHz, Chloroform-*d*)  $\delta$  8.24–8.19 (m, 1H), 8.12 (d,  $J = 9.4$  Hz, 1H), 7.66–7.58 (m, 3H), 7.46 (dd,  $J = 9.4, 2.8$  Hz, 1H), 7.39–7.34 (m, 2H), 7.32 (dd,  $J = 9.3, 2.1$  Hz, 1H), 6.87 (d,  $J = 2.7$  Hz, 1H), 6.77 (s, 1H), 3.75 (s, 3H), 1.58 (s, 9H);  $^{13}\text{C}$  NMR (126 MHz, Chloroform-*d*)  $\delta$  157.30, 152.90, 147.30, 146.72, 144.75, 138.88, 134.89, 131.27, 131.15, 130.27, 128.12, 127.98, 127.03, 126.29, 125.74, 124.11, 118.61, 102.12, 81.16, 55.57, 28.51; IR  $\nu_{\text{max}}$  ( $\text{cm}^{-1}$ ) 2974, 2932, 1711, 1520, 1228, 1154, 812, 728; HRMS calcd for  $\text{C}_{25}\text{H}_{24}\text{ClN}_2\text{O}_3$   $[\text{M}+\text{H}]^+$  435.142, found 435.1496.

## 4-(6-Chloro-2-methoxyacridin-9-yl)aniline (17)

A solution of 16 (35 mg, 0.08 mmol) in 5 mL of TFA/DCM (1:4) was stirred overnight at room temperature until no 16 was observed by TLC. The reaction solution was concentrated in vacuo and purified by silica gel chromatography (5%  $\text{NH}_4\text{OH}:\text{MeOH}:\text{DCM}$ ) to give pure product 17. Yield 95%, m.p. 207–211.  $^1\text{H}$  NMR (400 MHz, Chloroform-*d*)  $\delta$  8.24 (d,  $J = 1.8$  Hz, 1H), 8.15 (d,  $J = 9.4$  Hz, 1H), 7.71 (d,  $J = 9.3$  Hz, 1H), 7.47 (dd,  $J = 9.4, 2.8$  Hz, 1H), 7.32 (dd,  $J = 9.3, 2.1$  Hz, 1H), 7.21 (q,  $J = 4.4$

Hz, 1H), 7.21 (d,  $J = 8.5$  Hz, 1H), 6.96 (d,  $J = 2.7$  Hz, 1H), 6.91 (d,  $J = 8.4$  Hz, 2H), 3.76 (s, 3H);  $^{13}\text{C}$  NMR (101 MHz, Chloroform- $d$ )  $\delta$  157.19, 146.85, 146.26, 135.18, 131.53, 130.74, 128.34, 127.62, 126.87, 126.57, 125.86,

125.34, 124.31, 115.22, 102.56, 55.54; IR  $\nu_{\text{max}}$  ( $\text{cm}^{-1}$ ) 3446, 3303, 3182, 1630, 1608, 1418, 1229, 811; HRMS calcd for  $\text{C}_{20}\text{H}_{16}\text{ClN}_2\text{O}$   $[\text{M}+\text{H}]^+$  335.0862, found 335.0938.

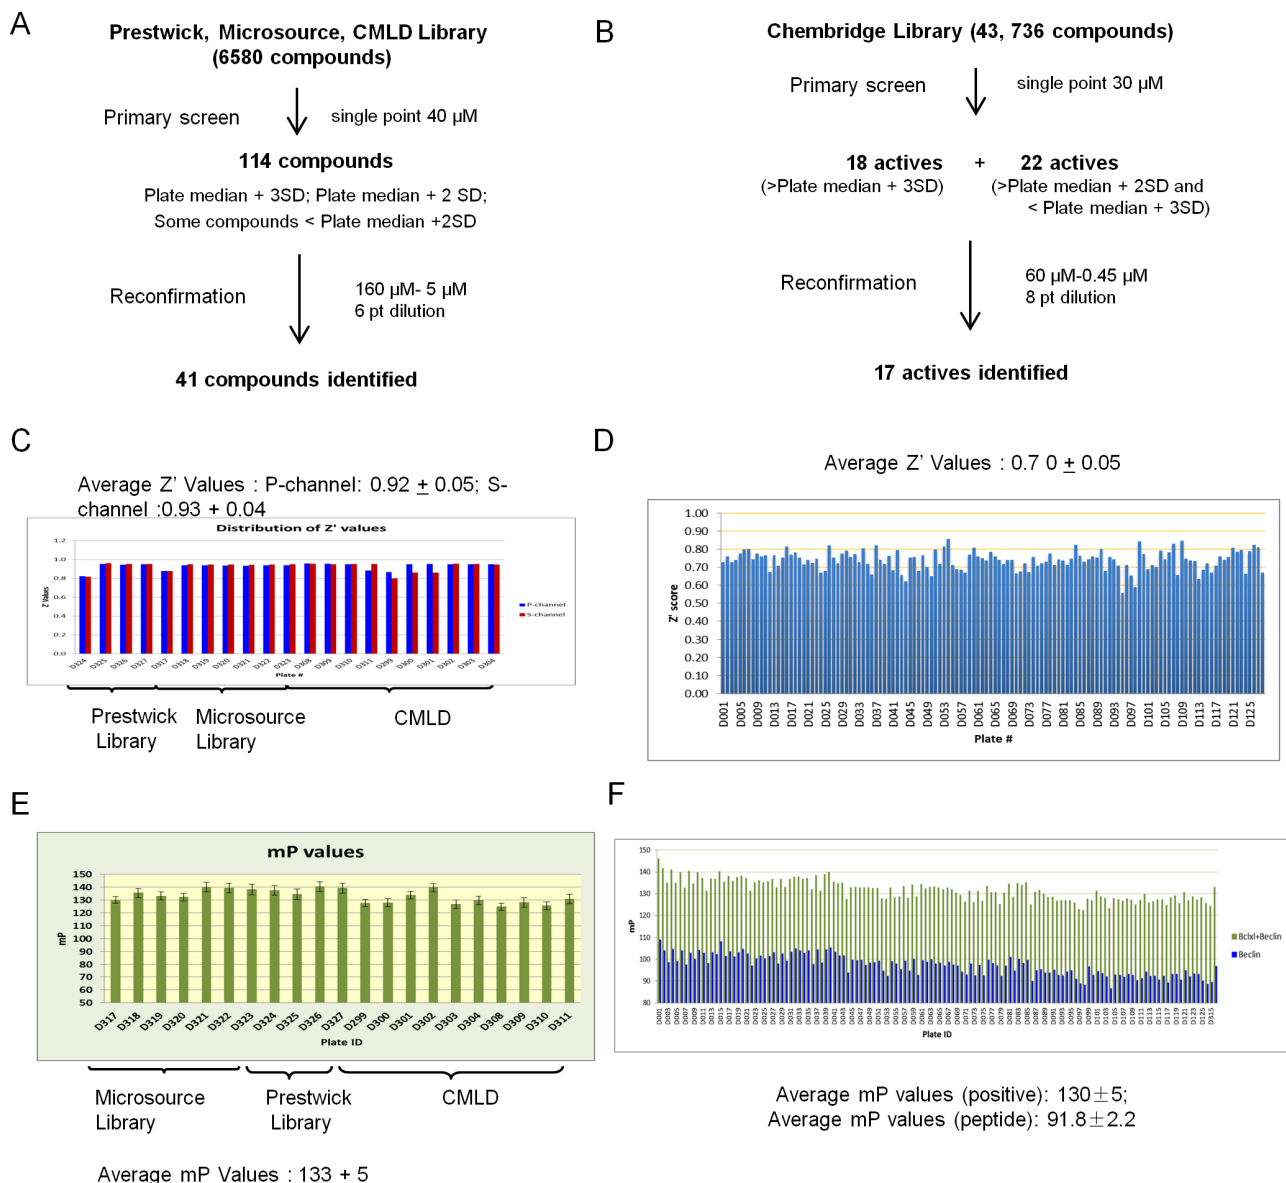

**Supplementary Figure 1: FP-based high-throughput screening.** HTS was performed with ~50000 compounds from Prestwick, Micsource, CMLD and Chembridge libraries. The four libraries were divided into two groups and screened separately. (A, B) High-throughput screening cascades of first screen (A) and second screen (B). (C, D) Distribution of  $Z'$  values of first screen (C) and second screen (D). The average  $Z'$  value is  $0.82 \pm 0.05$ , calculated using the same method in previous publication. (E, F) Distribution of mP values of first screen (E) and second screen (F).

**Supplementary Table 1: Summary of screen libraries and actives**

|               | Validation Library               | Compounds | Hits | Hit rate |
|---------------|----------------------------------|-----------|------|----------|
| First Screen  | Prestwick<br>Microsource<br>CMLD | 6580      | 41   | 0.623%   |
| Second Screen | Chembridge                       | 43736     | 17   | 0.038%   |
| Total         |                                  | 50316     | 58   | 0.115%   |

**Supplementary Table 2: 41 hits from Microsource library, Prestwick library and CMLD library, with name, CID number, code, percentage of inhibition at 40  $\mu$ M from primary screen, and dose-response reconfirmation data from secondary screen. See Supplementary\_Table\_2.****Supplementary Table 3: 17 hits from Chembridge library, with CID number, code, percentage of inhibition at 30  $\mu$ M from primary screen, and dose-response reconfirmation data from secondary screen**

| Plate ID | Coordinates | Code | CID | Primary Screen |              | Dose-response (% Inhibition) |            |            |             |              |               |               |              |      |
|----------|-------------|------|-----|----------------|--------------|------------------------------|------------|------------|-------------|--------------|---------------|---------------|--------------|------|
|          |             |      |     | mP             | % Inhibition | 60 $\mu$ M                   | 30 $\mu$ M | 15 $\mu$ M | 7.5 $\mu$ M | 3.75 $\mu$ M | 1.875 $\mu$ M | 0.975 $\mu$ M | 0.45 $\mu$ M |      |
|          |             |      |     | 1              | D017         | L10                          | B01        | 464050     | 86.7        | 36.8         | 79.7          | 67.5          | 52.5         | 33.5 |
| 2        | D025        | E17  | B02 | 672470         | 62.4         | 53.5                         | 72.2       | 68.5       | 66.0        | 54.8         | 44.1          | 28.7          | 15.5         | 6.6  |
| 3        | D006        | J14  | B03 | 748380         | 74.7         | 46.0                         | 67.8       | 60.9       | 56.0        | 54.4         | 45.1          | 38.0          | 31.9         | 18.0 |
| 4        | D040        | F18  | B04 | 2927046        | 83.3         | 39.9                         | 62.7       | 50.3       | 44.3        | 33.8         | 18.7          | 11.6          | 7.2          | 5.2  |
| 5        | D002        | B10  | B05 | 137753         | 102.5        | 26.9                         | 58.6       | 49.5       | 37.0        | 22.4         | 14.9          | 8.2           | 2.1          | 2.0  |
| 6        | D021        | M3   | B06 | 335513         | 110.6        | 18.7                         | 57.3       | 35.8       | 4.7         | 4.5          | 2.6           | 1.3           | 3.5          | 0.7  |
| 7        | D093        | D16  | B07 | 2917512        | 106.2        | 15.6                         | 53.1       | 37.8       | 22.0        | 12.8         | 8.4           | 5.1           | 3.8          | 2.4  |
| 8        | D071        | N15  | B08 | 2891543        | 105.7        | 15.7                         | 52.4       | 40.9       | 28.9        | 19.5         | 12.7          | 6.8           | 4.3          | 4.5  |
| 9        | D071        | D17  | B09 | 2891549        | 90.9         | 27.5                         | 50.4       | 42.3       | 31.2        | 22.7         | 13.6          | 7.9           | 5.2          | 1.7  |
| 10       | D014        | N5   | B10 | 927771         | 111.0        | 18.2                         | 46.7       | 36.5       | 26.9        | 19.1         | 9.6           | 4.9           | 2.7          | 0.6  |
| 11       | D054        | L7   | B11 | 710908         | 100.9        | 23.5                         | 43.2       | 33.7       | 23.5        | 15.5         | 9.7           | 4.9           | 3.7          | 2.6  |
| 12       | D090        | D21  | B12 | 799128         | 84.6         | 33.7                         | 40.7       | 29.1       | 22.8        | 18.8         | 16.4          | 14.6          | 17.3         | 7.4  |
| 13       | D019        | A23  | B13 | 6794179        | 103.7        | 24.0                         | 39.8       | 31.6       | 24.9        | 18.1         | 12.2          | 9.4           | 4.3          | 0.9  |
| 14       | D035        | F14  | B17 | 225394         | 121.2        | 10.9                         | 38.0       | 26.9       | 18.6        | 9.8          | 5.8           | 3.6           | 1.2          | 1.4  |
| 15       | D081        | E9   | B14 | 2913340        | 112.3        | 15.7                         | 26.5       | 18.1       | 11.5        | 9.7          | 5.6           | 2.6           | 3.3          | 1.1  |
| 16       | D004        | F10  | B15 | 2831046        | 125.0        | 10.6                         | 25.2       | 16.8       | 12.6        | 5.2          | 5.4           | 2.1           | 0.1          | -1.3 |
| 17       | D011        | L8   | B16 | 2834881        | 117.0        | 13.9                         | 22.9       | 14.6       | 10.1        | 3.5          | 1.2           | 0.3           | -0.6         | -0.5 |
